# Supplementary material
Source: publisher site journal article supplement (https://www.dovepress.com/article/605488)
Supplement: Supplementary file 1 [file 605488%20Supplementary%20File%201_1.docx]

| Database | Search Strings |
| --- | --- |
| PubMed | ("Diabetes Mellitus, Type 2"[Mesh] OR "Type 2 Diabetes"[tiab] OR "T2DM"[tiab]) AND ("Psychoeducation*"[tiab] OR "psycho-education*"[tiab] OR "multicomponent"[tiab] OR "multi-component"[tiab] OR "self-management"[tiab] OR "peer support"[tiab]) AND ("Glycemic Control"[Mesh] OR "HbA1c"[tiab] OR "Quality of Life"[tiab] OR "Diabetes distress"[tiab]) AND ("Randomized Controlled Trial"[tiab] OR "randomised controlled trial"[tiab] OR "RCT"[tiab]) AND (2016:2026[pdat]) |
| Scopus | TITLE-ABS-KEY ( ( "Type 2 Diabetes" OR "T2DM" ) AND ( "Psychoeducation*" OR "multicomponent" OR "multi-component" OR "self-management" OR "peer support" ) AND ( "Glycemic Control" OR "HbA1c" OR "Quality of Life" OR "Diabetes distress" ) AND ( "Randomized Controlled Trial" OR "randomised controlled trial" OR "RCT" ) ) AND PUBYEAR > 2015 AND ( LIMIT-TO ( DOCTYPE , "ar" ) ) AND ( LIMIT-TO ( SRCTYPE , "j" ) ) |
| EBSCOhost | ("Type 2 Diabetes" OR "T2DM") AND ("Psychoeducation*" OR "multicomponent" OR "multi-component" OR "self-management" OR "peer support") AND ("Glycemic Control" OR "HbA1c" OR "Quality of Life" OR "Diabetes distress") AND ("Randomized Controlled Trial" OR "randomised controlled trial" OR "RCT") AND PY 2016-2026 |

**Supplementary File 1**
